# Supplementary material
Source: PubMed Central journal article supplement (PMC7433214)
Supplement: NIHMS1610275-supplement-mmc1.pdf [file NIHMS1610275-supplement-mmc1.pdf]

# THE LANCET HIV

## Supplementary appendix

This appendix formed part of the original submission and has been peer reviewed. We post it as supplied by the authors.

Supplement to: Sudfeld CR, Mugusi F, Muhigi A, et al. Efficacy of vitamin D<sub>3</sub> supplementation for the prevention of pulmonary tuberculosis and mortality in HIV: a randomised, double-blind, placebo-controlled trial. *Lancet HIV* 2020; **7**: e463–71.

Supplementary Material for

**Efficacy of vitamin D supplementation for the prevention of pulmonary tuberculosis and mortality in HIV: a randomised, double-blind, placebo-controlled trial**

Sudfeld, et al.

*Secondary outcomes included in trial protocol to be reported in the second half of 2020*

- (i) post-randomization CD4 T cell count as mean difference in cells/ $\mu$ L,
- (ii) incidence of comorbidities and complications associated with HIV and/or ART,
- (iii) post-randomization body mass index (BMI) as mean difference in kg/m<sup>2</sup>,
- (iv) incidence of wasting (BMI <18.5 kg/m<sup>2</sup>) and >10% weight loss from baseline,
- (v) post-randomization depression and anxiety as mean difference in Hopkins Symptom Checklist (HSCL) scores,
- (vi) post-randomization physical activity as mean difference in metabolic equivalents (METs),
- (vii) post-randomization bone health biomarkers [parathyroid hormone (PTH) and alkaline phosphatase (ALP)] as mean difference in concentrations
- (viii) post-randomization immunologic biomarkers [interlukin-2 (IL-2), interlukin-12 (IL-12), interferon-gamma (IFN- $\gamma$ ), and the antimicrobial peptide cathelicidin as mean difference in concentrations

**Supplemental Table 1. Mean serum 25(OH)D ng/mL, percentage of participants with 25 (OH)D <30 ng/mL, and mean difference in 25(OH)D at baseline (n=399), 1 month (n=313), 6 months (n=357), and 12 months (n=314) of follow-up**

|                                                                                                       | Baseline<br>Mean ± SD | Baseline<br>% <30 ng/mL /<br>% <20 ng/mL | Month 1<br>Mean ± SD<br>25(OH)D ng/mL | Month 1<br>% <30 ng/mL /<br>% <20 ng/mL | Month 6<br>Mean ± SD | Month 6<br>% <30 ng/mL /<br>% <20 ng/mL | Month 12<br>Mean ± SD | Month 12<br>% <30 ng/mL /<br>% <20 ng/mL |
|-------------------------------------------------------------------------------------------------------|-----------------------|------------------------------------------|---------------------------------------|-----------------------------------------|----------------------|-----------------------------------------|-----------------------|------------------------------------------|
| Vitamin D (n=207)                                                                                     | 27.9 ± 7.7            | 63.8% / 16.4%                            | 50.7 ± 12.8                           | 3.0% / 0.0%                             | 38.0 ± 8.4           | 13.8% / 1.6%                            | 38.1 ± 8.5            | 12.3% / 1.2%                             |
| Placebo (n=192)                                                                                       | 27.3 ± 7.9            | 71.4% / 14.6%                            | 27.8 ± 7.0                            | 62.2% / 10.8%                           | 29.3 ± 7.4           | 56.6% / 11.9%                           | 27.6 ± 7.2            | 62.9% / 14.6%                            |
| Mean difference in<br>25(OH)D concentration<br>ng/mL for vitamin D<br>compared to placebo<br>(95% CI) | 0.6<br>(-1.1, 2.2)    |                                          | 23.0<br>(21.1, 24.8)                  |                                         | 8.7<br>(7.0, 10.5)   |                                         | 10.4<br>(8.6, 12.3)   |                                          |
| p-value for mean<br>difference                                                                        | 0.52                  |                                          | <0.0001                               |                                         | <0.0001              |                                         | <0.0001               |                                          |

**Supplemental Table 2. Distribution of cause of death by randomized treatment arm (n=415 deaths)**

|                                 | Vitamin D<br>n=211<br>n (%) | Placebo<br>n=204<br>n (%) |
|---------------------------------|-----------------------------|---------------------------|
| Pulmonary TB                    | 42 (19.9)                   | 43 (21.1)                 |
| Extrapulmonary TB               | 3 (1.4)                     | 3 (1.5)                   |
| Infection, non-specific         | 40 (19.0)                   | 36 (17.7)                 |
| Diarrhea                        | 19 (9.0)                    | 28 (13.7)                 |
| Cardiovascular disease / stroke | 26 (12.3)                   | 16 (7.8)                  |
| Cryptococcal meningitis         | 11 (5.2)                    | 10 (4.9)                  |
| Pneumonia                       | 9 (4.3)                     | 10 (4.9)                  |
| Anemia                          | 4 (1.9)                     | 8 (3.9)                   |
| Kidney failure                  | 6 (2.8)                     | 4 (2.0)                   |
| Meningitis/encephalitis         | 6 (2.8)                     | 3 (1.5)                   |
| Cancers                         | 4 (1.9)                     | 4 (2.0)                   |
| Liver failure                   | 2 (1.0)                     | 5 (2.5)                   |
| Pneumocystis pneumonia          | 4 (1.9)                     | 2 (1.0)                   |
| Malaria                         | 4 (1.9)                     | 1 (0.5)                   |
| Kaposi's sarcoma                | 1 (0.5)                     | 1 (0.5)                   |
| Motor vehicle accident          | 2 (1.0)                     | 0 (0.0)                   |
| Other*                          | 7 (3.3)                     | 2 (1.0)                   |
| Unknown                         | 21 (10.0)                   | 28 (13.7)                 |

\*Other includes starvation (5), dehydration (1), intestinal obstruction (1), gastrointestinal hemorrhage (1) and pulmonary embolism (1).

**Supplemental Table 3. Baseline demographic and health characteristics of randomized participants with p-values for differences to inform sensitivity analyses accounting for potential imbalances (n=4,000)**

|                                              | Vitamin D<br>N=2,001<br>n (%) or mean $\pm$ SD | Placebo<br>N=1,999<br>n (%) or mean $\pm$ SD | p-value |
|----------------------------------------------|------------------------------------------------|----------------------------------------------|---------|
| Female                                       | 1367 (68.3)                                    | 1368 (68.4)                                  | 0.94    |
| Mean age, years                              | 38.6 $\pm$ 9.8                                 | 38.8 $\pm$ 10.0                              | 0.64    |
| Education                                    |                                                |                                              |         |
| No formal education                          | 308 (15.4)                                     | 327 (16.4)                                   | 0.77    |
| Primary                                      | 1294 (64.7)                                    | 1294 (64.7)                                  |         |
| Secondary/ advanced                          | 398 (19.9)                                     | 377 (18.9)                                   |         |
| Body mass index (kg/m <sup>2</sup> )         |                                                |                                              |         |
| <18.5 kg/m <sup>2</sup>                      | 440 (22.0)                                     | 404 (20.2)                                   | 0.27    |
| 18.5-24.9 kg/m <sup>2</sup>                  | 1038 (51.9)                                    | 1064 (53.2)                                  |         |
| $\geq$ 25.0 kg/m <sup>2</sup>                | 521 (26.0)                                     | 531 (26.6)                                   |         |
| CD4 T-cell count                             |                                                |                                              |         |
| < 200 cells per $\mu$ L                      | 866 (43.3)                                     | 845 (42.3)                                   | 0.62    |
| 200-349 cells per $\mu$ L                    | 461 (23.0)                                     | 445 (22.3)                                   |         |
| 350-499 cells per $\mu$ L                    | 300 (15.0)                                     | 333 (16.7)                                   |         |
| $\geq$ 500 cells per $\mu$ L                 | 284 (14.2)                                     | 278 (13.9)                                   |         |
| Missing                                      | 90 (4.5)                                       | 98 (4.9)                                     |         |
| WHO HIV disease stage                        |                                                |                                              |         |
| I / II                                       | 744 (37.2)                                     | 760 (38.0)                                   | 0.86    |
| III                                          | 1161 (58.0)                                    | 1143 (57.2)                                  |         |
| IV                                           | 96 (4.8)                                       | 96 (4.8)                                     |         |
| Baseline pulmonary TB                        | 189 (9.5)                                      | 175 (8.8)                                    | 0.45    |
| Isoniazid preventive therapy                 | 35 (1.8)                                       | 27 (1.4)                                     | 0.31    |
| HAART regimen                                |                                                |                                              |         |
| Efavirenz/lamivudine/tenofovir (EFV/3TC/TDF) | 1940 (97.0)                                    | 1943 (97.2)                                  | 0.94    |
| Other HAART regimen                          | 61 (3.0)                                       | 56 (2.8)                                     |         |
| Vitamin D status at screening visit          |                                                |                                              |         |
| Insufficient 25(OH)D 20.0- 30.0 ng/mL        | 955 (47.7)                                     | 972 (48.6)                                   | 0.042   |
| Moderate deficiency 25(OH)D 10.0- 19.9 ng/mL | 920 (46.0)                                     | 865 (43.3)                                   |         |
| Severe deficiency 25(OH)D 0-9.9 ng/mL        | 126 (6.3)                                      | 162 (8.1)                                    |         |

**Supplemental Table 4. Sensitivity analysis of the effect of vitamin D<sub>3</sub> supplementation on all-cause mortality and incident pulmonary tuberculosis adjusting for baseline vitamin D level and CD4 T-cell count**

|                                                                               | Vitamin D<br>No. events /<br>No. randomized at risk (%) | Placebo<br>No. events /<br>No. randomized at risk (%) | Adjusted* Hazard ratio<br>(95% CI) | P value |
|-------------------------------------------------------------------------------|---------------------------------------------------------|-------------------------------------------------------|------------------------------------|---------|
| All-cause mortality                                                           | 211 / 2001 (10.5)                                       | 204 / 1999 (10.2)                                     | 1.02 (0.84-1.24)                   | 0.85    |
| Incident pulmonary TB                                                         | 50 / 1812 (2.8)                                         | 64 / 1827 (3.5)                                       | 0.78 (0.54-1.13)                   | 0.18    |
| Incident sputum smear-positive pulmonary TB                                   | 20 / 1812 (1.1)                                         | 37 / 1827 (2.0)                                       | 0.53 (0.31-0.92)                   | 0.026   |
| Incident sputum smear-negative pulmonary TB                                   | 30 / 1812 (1.6)                                         | 27 / 1827 (1.5)                                       | 1.12 (0.66-1.88)                   | 0.68    |
| Incident microbiologically confirmed TB (sputum or GeneXpert positive)        | 22 / 1812 (1.2)                                         | 38 / 1827 (2.1)                                       | 0.58 (0.34-0.97)                   | 0.39    |
| Incident high bacillary load ( $\geq 2+$ ) sputum smear-positive pulmonary TB | 10 / 1812 (0.6)                                         | 27 / 1827 (1.5)                                       | 0.37 (0.18-0.76)                   | 0.0065  |

\*Adjusted for baseline vitamin D concentration (<10, 10-19.9,  $\geq 20$  ng/mL) and CD4 T-cell count (missing, <200, 200-349, 350-499,  $\geq 500$ , cells per  $\mu$ L)

**Supplemental Table 5. Sensitivity analysis of the analysis of effect modification of vitamin D<sub>3</sub> on mortality by pre-specified baseline factors adjusting for baseline vitamin D level and CD4 T-cell count**

|                                                     | Vitamin D<br>n / N (%) | Placebo<br>n / N (%) | Hazard Ratio<br>(95% CI) | P-value for<br>effect modification |
|-----------------------------------------------------|------------------------|----------------------|--------------------------|------------------------------------|
| All participants                                    | 211 / 2001 (10.5)      | 204 / 1999 (10.2)    | 1.04 (0.85-1.25)         | -                                  |
| <i>Subgroups</i>                                    |                        |                      |                          |                                    |
| Sex                                                 |                        |                      |                          |                                    |
| Male                                                | 105 / 634 (16.6)       | 93 / 631 (14.7)      | 1.15 (0.87-1.52)         | 0.29                               |
| Female                                              | 106 / 1367 (7.8)       | 111 / 1368 (8.1)     | 0.93 (0.71-1.22)         |                                    |
| Age                                                 |                        |                      |                          |                                    |
| < 40 years                                          | 101 / 1176 (8.6)       | 90 / 1130 (8.0)      | 1.05 (0.80-1.40)         | 0.90                               |
| ≥ 40 years                                          | 110 / 825 (13.3)       | 114 / 755 (13.1)     | 1.03 (0.79-1.34)         |                                    |
| CD4 T-cell count                                    |                        |                      |                          |                                    |
| < 200 cells per $\mu$ L                             | 134 / 866 (15.5)       | 141 / 845 (16.7)     | 0.91 (0.72-1.16)         | 0.17                               |
| ≥ 200 cells per $\mu$ L                             | 60 / 1045 (5.7)        | 44 / 1056 (4.2)      | 1.41 (0.96-2.08)         |                                    |
| Missing                                             | 17 / 90 (18.9)         | 19 / 98 (19.4)       | 0.98 (0.51-1.90)         |                                    |
| WHO HIV disease stage                               |                        |                      |                          |                                    |
| I / II                                              | 29 / 744 (3.9)         | 38 / 760 (5.0)       | 0.80 (0.49-1.29)         | 0.013                              |
| III                                                 | 160 / 1161 (13.8)      | 128 / 1143 (11.2)    | 1.20 (0.95-1.51)         |                                    |
| IV                                                  | 22 / 96 (22.9)         | 38 / 96 (39.6)       | 0.54 (0.32-0.92)         |                                    |
| Baseline pulmonary TB                               |                        |                      |                          |                                    |
| Yes                                                 | 23 / 189 (12.2)        | 35 / 175 (20.0)      | 0.58 (0.34-0.99)         | 0.023                              |
| No                                                  | 188 / 1812 (10.4)      | 169 / 1824 (9.3)     | 1.11 (0.90-1.37)         |                                    |
| Body mass index                                     |                        |                      |                          |                                    |
| <18.5 kg/m <sup>2</sup>                             | 94 / 440 (21.4)        | 83 / 404 (20.5)      | 0.98 (0.73-1.32)         | 0.99                               |
| ≥ 18.5 kg/m <sup>2</sup>                            | 115 / 1559 (7.4)       | 121 / 1595 (7.6)     | 0.98 (0.76-1.25)         |                                    |
| Vitamin D status at screening visit                 |                        |                      |                          |                                    |
| Deficient 25(OH)D 0-19.9 ng/mL                      | 104 / 1046 (9.9)       | 98 / 1027 (9.5)      | 1.03 (0.78-1.36)         | 0.97                               |
| Insufficient 25(OH)D 20.0-29.9 ng/mL                | 107 / 955 (11.2)       | 106 / 972 (10.9)     | 1.02 (0.78-1.33)         |                                    |
| Adherence to randomized trial regimen               |                        |                      |                          |                                    |
| High – 100% on weekly doses and ≥90% on daily doses | 103 / 876 (11.8)       | 110 / 889 (12.4)     | 0.92 (0.70-1.22)         | 0.28                               |
| Low – <100% on weekly doses or < 90% on daily doses | 108 / 1125 (9.6)       | 94 / 1110 (8.5)      | 1.14 (0.87-1.50)         |                                    |

\*Adjusted for baseline vitamin D level (<10, 10-19.9, ≥20 ng/mL) and CD4 T-cell count (missing, <200, 200-349, 350-499, ≥ 500 cells per  $\mu$ L)



**Supplemental Table 6. Modifiers of the effect of vitamin D<sub>3</sub> on incidence of pulmonary tuberculosis**

|                                                     | Vitamin D<br>n / N (%) | Placebo<br>n / N (%) | Hazard Ratio<br>(95% CI) | P-value for<br>effect modification |
|-----------------------------------------------------|------------------------|----------------------|--------------------------|------------------------------------|
| All participants                                    | 50 / 1812 (2.8)        | 64 / 1827 (3.5)      | 0.78 (0.54-1.13)         | -                                  |
| <i>Subgroups</i>                                    |                        |                      |                          |                                    |
| Sex                                                 |                        |                      |                          |                                    |
| Male                                                | 27 / 535 (5.1)         | 26 / 534 (4.9)       | 1.03 (0.61-1.78)         | 0.15                               |
| Female                                              | 23 / 1277 (1.8)        | 38 / 1293 (3.0)      | 0.60 (0.36-1.02)         |                                    |
| CD4 T-cell count                                    |                        |                      |                          |                                    |
| <200 cells per µL                                   | 31 / 753 (4.1)         | 34 / 741 (4.6)       | 0.87 (0.54-1.42)         | 0.74                               |
| ≥200 cells per µL                                   | 18 / 983 (1.8)         | 28 / 998 (2.8)       | 0.66 (0.36-1.19)         |                                    |
| WHO HIV disease stage                               |                        |                      |                          |                                    |
| I / II                                              | 14 / 741 (1.9)         | 19 / 753 (2.5)       | 0.74 (0.37-1.48)         | 0.25                               |
| III                                                 | 32 / 994 (2.7)         | 44 / 994 (4.4)       | 0.72 (0.46-1.14)         |                                    |
| IV                                                  | 4 / 79 (5.1)           | 1 / 79 (1.3)         | 3.87 (0.44-34.1)         |                                    |
| Baseline vitamin D status                           |                        |                      |                          |                                    |
| Insufficient 25(OH)D ≥20 ng/mL and <30 ng/mL        | 23 / 855 (2.7)         | 34 / 874 (3.9)       | 0.68 (0.40-1.15)         | 0.50                               |
| Deficient 25(OH)D <20 ng/mL                         | 27 / 957 (2.8)         | 30 / 953 (3.2)       | 0.90 (0.54-1.51)         |                                    |
| Adherence to trial regimen                          |                        |                      |                          |                                    |
| High – 100% on weekly doses and ≥90% on daily doses | 20 / 803 (2.5)         | 22 / 811 (2.7)       | 0.91 (0.50-1.67)         | 0.53                               |
| Low – <100% on weekly doses or <90% on daily doses  | 30 / 1009 (3.0)        | 42 / 1013 (4.2)      | 0.71 (0.45-1.14)         |                                    |

**Supplemental Table 7. Sensitivity analysis of the analysis of effect modification of vitamin D<sub>3</sub> on incidence of pulmonary tuberculosis by pre-specified baseline factors adjusting for baseline vitamin D level and CD4 T-cell count**

|                                                           | Vitamin D<br>n / N (%) | Placebo<br>n / N (%) | Hazard Ratio<br>(95% CI) | P-value for<br>effect modification |
|-----------------------------------------------------------|------------------------|----------------------|--------------------------|------------------------------------|
| Sex                                                       |                        |                      |                          |                                    |
| Male                                                      | 27 / 535 (5.1)         | 26 / 534 (4.9)       | 1.07 (0.62-1.83)         | 0.12                               |
| Female                                                    | 23 / 1277 (1.8)        | 38 / 1293 (3.0)      | 0.60 (0.35-1.00)         |                                    |
| CD4 T-cell count                                          |                        |                      |                          |                                    |
| <200 cells per $\mu$ L                                    | 31 / 753 (4.1)         | 34 / 741 (4.6)       | 0.88 (0.54-1.43)         | 0.74                               |
| $\geq$ 200 cells per $\mu$ L                              | 18 / 983 (1.8)         | 28 / 998 (2.8)       | 0.67 (0.37-1.20)         |                                    |
| WHO HIV disease stage                                     |                        |                      |                          |                                    |
| I / II                                                    | 14 / 741 (1.9)         | 19 / 753 (2.5)       | 0.75 (0.37-1.49)         | 0.44                               |
| III                                                       | 32 / 994 (2.7)         | 44 / 994 (4.4)       | 0.72 (0.45-1.13)         |                                    |
| IV                                                        | 4 / 79 (5.1)           | 1 / 79 (1.3)         | 3.80 (0.45-32.1)         |                                    |
| Baseline vitamin D status                                 |                        |                      |                          |                                    |
| Insufficient 25(OH)D $\geq$ 20 ng/mL and <30 ng/mL        | 23 / 855 (2.7)         | 34 / 874 (3.9)       | 0.67 (0.40-1.15)         | 0.50                               |
| Deficient 25(OH)D <20 ng/mL                               | 27 / 957 (2.8)         | 30 / 953 (3.2)       | 0.87 (0.52-1.46)         |                                    |
| Adherence to trial regimen                                |                        |                      |                          |                                    |
| High – 100% on weekly doses and $\geq$ 90% on daily doses | 20 / 803 (2.5)         | 22 / 811 (2.7)       | 0.90 (0.48-1.62)         | 0.60                               |
| Low – <100% on weekly doses or <90% on daily doses        | 30 / 1009 (3.0)        | 42 / 1013 (4.2)      | 0.72 (0.45-1.16)         |                                    |

\*Adjusted for baseline vitamin D level (<10, 10-19.9,  $\geq$ 20 ng/mL) and CD4 T-cell count (missing, <200, 200-349, 350-499,  $\geq$  500 cells per  $\mu$ L)

**Supplemental Table 8. Sensitivity analysis of the effect of vitamin D<sub>3</sub> supplementation on pulmonary TB incidence excluding cases in the first 14, 30, and 90 days of follow-up.**

|                                                                       | Vitamin D<br>No. events /<br>No. randomized at risk (%) | Placebo<br>No. events /<br>No. randomized at risk (%) | Hazard ratio<br>(95% CI) |
|-----------------------------------------------------------------------|---------------------------------------------------------|-------------------------------------------------------|--------------------------|
| Incident pulmonary TB excluding cases ≤ 14 days                       | 45 / 1772 (2.5)                                         | 52 / 1772 (2.9)                                       | 0.87 (0.58-1.29)         |
| Incident pulmonary TB excluding cases ≤ 30 days                       | 32 / 1717 (1.9)                                         | 38 / 1727 (2.2)                                       | 0.84 (0.53-1.35)         |
| Incident pulmonary TB excluding cases ≤ 90 days                       | 17 / 1634 (1.0)                                         | 24 / 1653 (1.5)                                       | 0.71 (0.38-1.32)         |
|                                                                       |                                                         |                                                       |                          |
| Incident sputum smear-positive pulmonary TB excluding cases ≤ 14 days | 17 / 1772 (1.0)                                         | 30 / 1772 (1.7)                                       | 0.56 (0.31-1.02)         |
| Incident sputum smear-positive pulmonary TB excluding cases ≤ 30 days | 10 / 1717 (0.6)                                         | 21 / 1727 (1.2)                                       | 0.47 (0.22-1.00)         |
| Incident sputum smear-positive pulmonary TB excluding cases ≤ 90 days | 1 / 1634 (0.1)                                          | 13 / 1653 (0.8)                                       | 0.08 (0.01-0.58)         |
|                                                                       |                                                         |                                                       |                          |
| Incident sputum smear-negative pulmonary TB excluding cases ≤ 14 days | 28 / 1772 (1.6)                                         | 22 / 1772 (1.2)                                       | 1.28 (0.73-2.24)         |
| Incident sputum smear-negative pulmonary TB excluding cases ≤ 30 days | 22 / 1717 (1.3)                                         | 17 / 1727 (1.0)                                       | 1.30 (0.69-2.46)         |
| Incident sputum smear-negative pulmonary TB excluding cases ≤ 90 days | 16 / 1634 (1.0)                                         | 11 / 1653 (0.7)                                       | 1.46 (0.68-3.15)         |

**Supplemental Table 9. Adverse events by randomized treatment arm**

|                                   | Vitamin D | Placebo |
|-----------------------------------|-----------|---------|
| Hypercalcemia (Grade 1)           | 3         | 2       |
| Total hospitalizations (Grade 3)  | 101       | 94      |
| <i>Reason for hospitalization</i> |           |         |
| Suspected infection               | 19        | 25      |
| Malaria                           | 17        | 15      |
| Anemia                            | 14        | 21      |
| Diarrhea                          | 10        | 1       |
| Pneumonia                         | 5         | 4       |
| Vomiting                          | 5         | 2       |
| Cardiovascular-related            | 5         | 5       |
| Dehydration                       | 4         | 4       |
| Tuberculosis                      | 3         | 3       |
| Kaposi's sarcoma                  | 3         | 0       |
| Injury                            | 3         | 4       |
| Peripheral edema                  | 3         | 1       |
| Post-operative complications      | 2         | 3       |
| Abdominal pain                    | 2         | 4       |
| Mental illness                    | 1         | 0       |
| Cancer                            | 1         | 0       |
| Kidney failure                    | 1         | 0       |
| Uterine fibroids                  | 1         | 0       |
| Lower limb pain                   | 1         | 0       |
| Peptic ulcer                      | 1         | 0       |
| Loss of consciousness             | 0         | 2       |
